# Supplementary material for: Ocean liming effects on dissolved organic matter dynamics
Source: Copernicus journal article supplement (doi:10.5194/egusphere-2024-625), 2024-03-14
Supplement: Supplementary file 1 [file egusphere-2024-625-supplement.pdf]

# Supplementary Material

## Ocean liming effects on dissolved organic matter dynamics

Chiara Santinelli<sup>1</sup>, Silvia Valsecchi<sup>1,2,3</sup>, Simona Retelletti Brogi<sup>1,4</sup>, Giancarlo Bachi<sup>1</sup>, Giovanni Checcucci<sup>1</sup>, Mirco Guerrazzi<sup>1</sup>, Elisa Camatti<sup>5</sup>, Stefano Caserini<sup>3,6</sup>, Arianna Azzellino<sup>2,3</sup>, Daniela Basso<sup>3,7</sup>

1 Consiglio Nazionale delle Ricerche (CNR), Istituto di Biofisica. Via Moruzzi 1, 56124 Pisa (PI), Italia.

2 Politecnico di Milano, Dipartimento di Ingegneria Civile ed Ambientale. Piazza Leonardo da Vinci 32, 20133 Milano (MI), Italia.

3 Consorzio Nazionale Interuniversitario per le Scienze del Mare (CoNISMa). Piazzale Flaminio 9, 00196 Roma (RM), Italia.

4 Istituto di Oceanografia e Geofisica Sperimentale (OGS), Sezione di Oceanografia. Via Piccard 54, 34151 Trieste (TS), Italia.

5 Consiglio Nazionale delle Ricerche (CNR), Istituto di Scienze Marine. Arsenale Tesa 104, Castello 2737/F - 30122 Venezia (VE), Italia.

6 Università di Parma, Dipartimento di Ingegneria e Architettura. Parco Area delle Scienze 181/A, 43124 Parma (Pr), Italia.

7 Università degli Studi di Milano-Bicocca, Dipartimento di Scienze dell'ambiente e della terra. Piazza della Scienza 4, 20126 Milano (MI), Italia.

*Correspondence to:* Chiara Santinelli ([chiara.santinelli@ibf.cnr.it](mailto:chiara.santinelli@ibf.cnr.it))

| <b>Standard Hydrated lime range</b>                      | <b>EU representative Product</b> |
|----------------------------------------------------------|----------------------------------|
| Chemical purity (CaO) in %                               | -                                |
| Equivalent Ca(OH) <sub>2</sub> %                         | 91-95                            |
| Particle size distribution and average diameter d50 (μm) | 10-16                            |
| Specific surface area (m <sup>2</sup> /g)                | 15-23                            |
| Bulk density (Kg/m <sup>3</sup> )                        | 600                              |

**Table S1: High-purity calcium hydroxide was used for the experiment. Product specification by UniCalce (2021)**

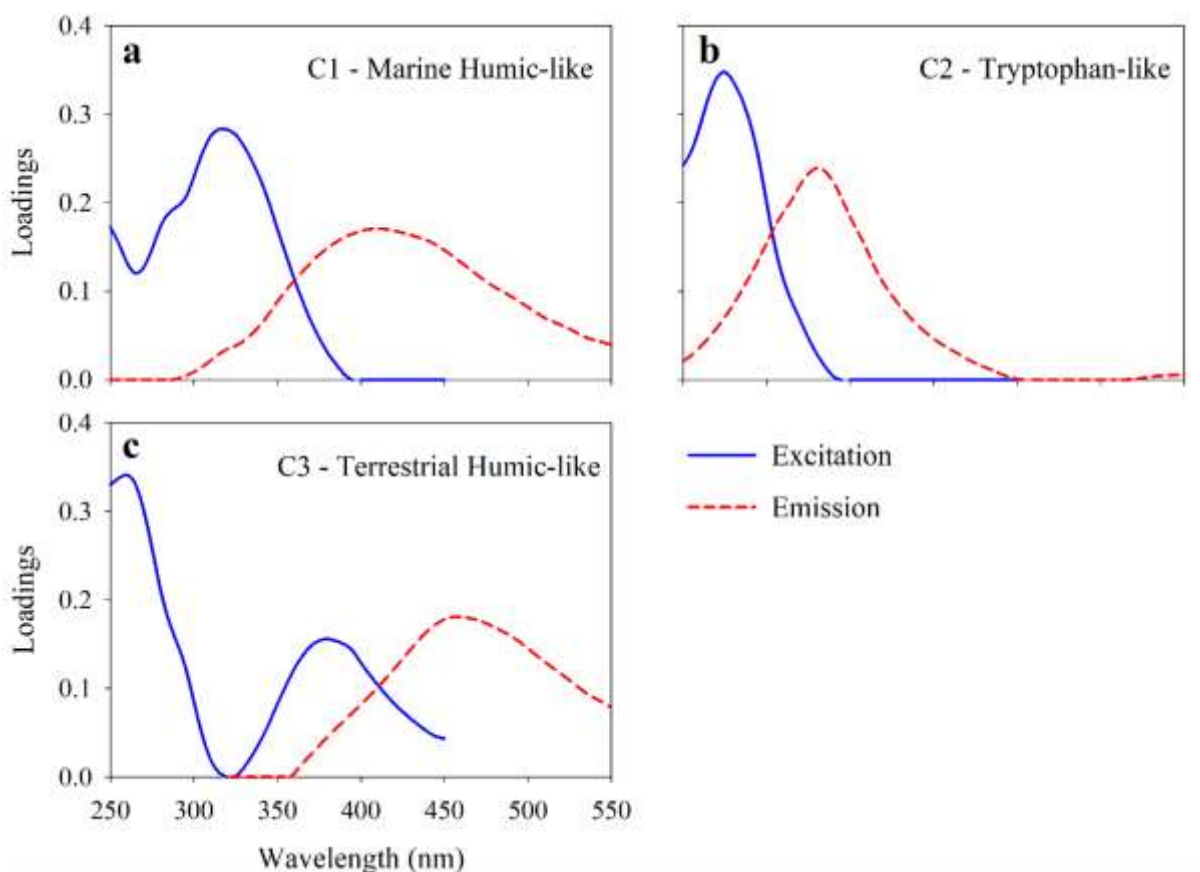

Figure S1 –Excitation and Emission spectra of the 3 components validated by the PARAFAC analysis applied to the 63 EEMs from the experiment with Mediterranean Sea water.

| Components            | $\lambda_{ex}$ peak (nm) | $\lambda_{em}$ peak (nm) | Identification         | Similar components                                                                                                                                                       |
|-----------------------|--------------------------|--------------------------|------------------------|--------------------------------------------------------------------------------------------------------------------------------------------------------------------------|
| C1 <sub>Mh-Med</sub>  | 315                      | 409                      | Marine humic-like      | Pitta and Zeri (2021)<br>Chen et al. (2016)<br>Gao and Guéguen (2018)<br>Gao and Guéguen (2017)<br>Kida et al. (2019)<br>Dainard and Guéguen (2013)<br>Lei et al. (2021) |
| C2 <sub>Trp-Med</sub> | 275                      | 331                      | Tryptophane-like       | Cawley et al. (2012a)<br>Wünsch and Murphy (2021)<br>Yamashita et al. (2021)<br>Cawley et al. (2012b)<br>Shutova et al. (2014)                                           |
| C3 <sub>Th-Med</sub>  | 260                      | [380] 456                | Terrestrial humic-like | Pitta and Zeri (2021)<br>Gonçalves-Araujo et al. (2015)<br>Dainard and Guéguen (2013)                                                                                    |

Table S2. Characterization of the PARAFAC components validated for the MedSea. The comparison with the components in the literature was carried out by using the Openfluor database.

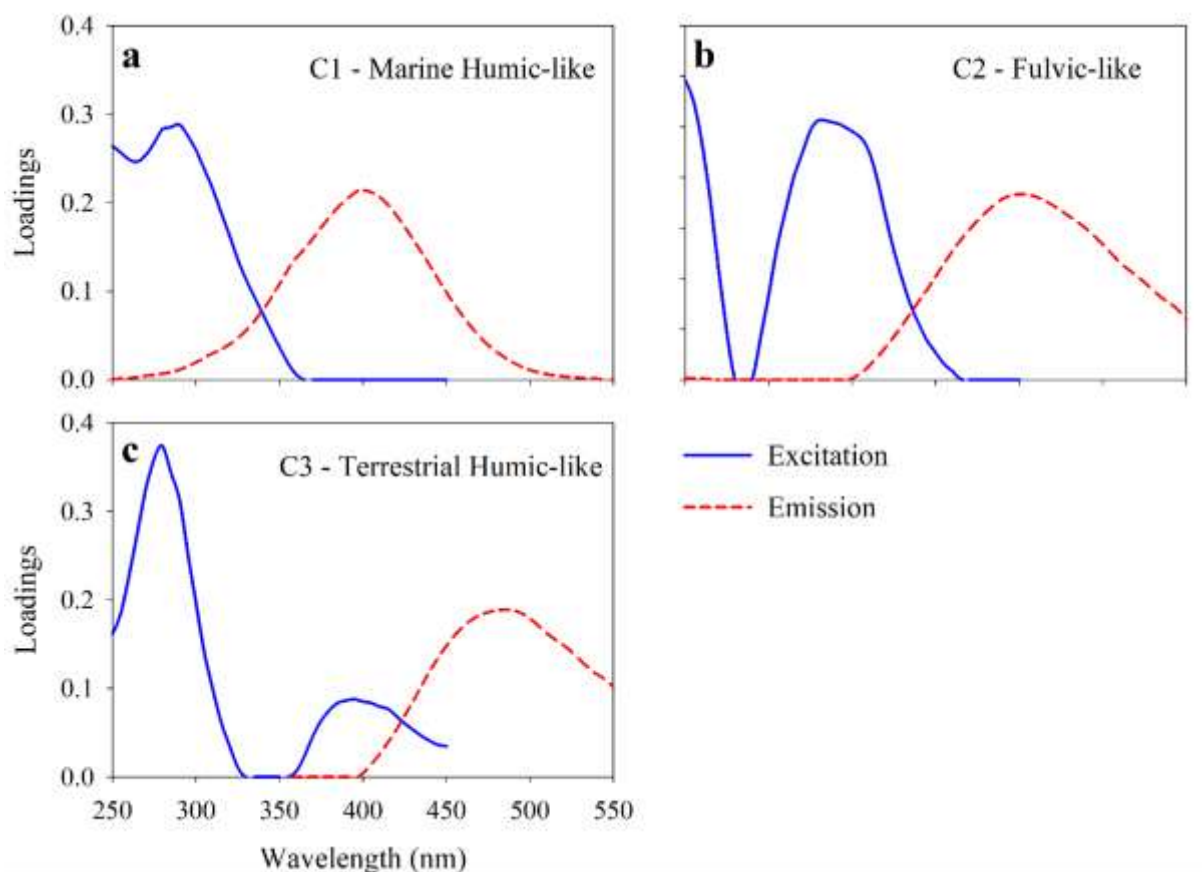

**Figure S2.** Excitation and Emission spectra of the 3 components validated by the PARAFAC analysis applied to the 50 EEMs from the experiment with Baltic Sea water.

| Components                   | $\lambda_{ex}$ peak (nm) | $\lambda_{em}$ peak (nm) | Identification         | Similar components                                                                                                                                             |
|------------------------------|--------------------------|--------------------------|------------------------|----------------------------------------------------------------------------------------------------------------------------------------------------------------|
| <b>C1</b> <sub>Mh-Med</sub>  | 290                      | 400                      | Marine humic-like      | Wünsch et al. (2015)<br>Wauthy et al. (2018)<br>Retelletti Brogi et al. (2022)<br>Yu et al. (2015)<br>Guéguen et al. (2015)<br>Lapierre and Del Giorgio (2014) |
| <b>C2</b> <sub>Trp-Med</sub> | 330                      | 452                      | Fulvic-like            | Kothawala et al. (2014)<br>Andersson et al. (2018)                                                                                                             |
| <b>C3</b> <sub>Th-Med</sub>  | 280                      | 485                      | Terrestrial humic-like | Andersson et al. (2018)                                                                                                                                        |

**Table S3.** Characterization of the PARAFAC components validated for the BalSea. The comparison with the components in the literature was carried out by using the Openfluor database.

## References

- Andersson, M., Catalán, N., Rahman, Z., Tranvik, L., and Lindström, E.: Effects of sterilization on dissolved organic carbon (DOC) composition and bacterial utilization of DOC from lakes, *Aquat Microb Ecol*, 82, 199–208, <https://doi.org/10.3354/ame01890>, 2018.
- Cawley, K. M., Ding, Y., Fourqurean, J., and Jaffé, R.: Characterising the sources and fate of dissolved organic matter in Shark Bay, Australia: a preliminary study using optical properties and stable carbon isotopes, *Mar Freshw Res*, 63, 1098, <https://doi.org/10.1071/MF12028>, 2012a.
- Cawley, K. M., Butler, K. D., Aiken, G. R., Larsen, L. G., Huntington, T. G., and McKnight, D. M.: Identifying fluorescent pulp mill effluent in the Gulf of Maine and its watershed, *Mar Pollut Bull*, 64, 1678–1687, <https://doi.org/10.1016/j.marpolbul.2012.05.040>, 2012b.
- Chen, M., Kim, J.-H., Nam, S.-I., Niessen, F., Hong, W.-L., Kang, M.-H., and Hur, J.: Production of fluorescent dissolved organic matter in Arctic Ocean sediments., *Sci Rep*, 6, 39213, <https://doi.org/10.1038/srep39213>, 2016.
- Dainard, P. G. and Guéguen, C.: Distribution of PARAFAC modeled CDOM components in the North Pacific Ocean, Bering, Chukchi and Beaufort Seas, *Mar Chem*, 157, 216–223, <https://doi.org/10.1016/j.marchem.2013.10.007>, 2013.
- Gao, Z. and Guéguen, C.: Size distribution of absorbing and fluorescing DOM in Beaufort Sea, Canada Basin, *Deep Sea Res I: Oceanographic Research Papers*, 121, 30–37, <https://doi.org/10.1016/j.dsr.2016.12.014>, 2017.
- Gao, Z. and Guéguen, C.: Distribution of thiol, humic substances and colored dissolved organic matter during the 2015 Canadian Arctic GEOTRACES cruises, *Mar Chem*, 203, 1–9, <https://doi.org/10.1016/j.marchem.2018.04.001>, 2018.
- Gonçalves-Araujo, R., Stedmon, C. A., Heim, B., Dubinenkov, I., Kraberg, A., Moiseev, D., and Bracher, A.: From Fresh to Marine Waters: Characterization and Fate of Dissolved Organic Matter in the Lena River Delta Region, Siberia, *Front Mar Sci*, 2, <https://doi.org/10.3389/fmars.2015.00108>, 2015.
- Guéguen, C., Itoh, M., Kikuchi, T., Eert, J., and Williams, W. J.: Variability in dissolved organic matter optical properties in surface waters in the Amerasian Basin, *Front Mar Sci*, 2, <https://doi.org/10.3389/fmars.2015.00078>, 2015.
- Kida, M., Kojima, T., Tanabe, Y., Hayashi, K., Kudoh, S., Maie, N., and Fujitake, N.: Origin, distributions, and environmental significance of ubiquitous humic-like fluorophores in Antarctic lakes and streams, *Water Res*, 163, 114901, <https://doi.org/10.1016/j.watres.2019.114901>, 2019.
- Kothawala, D. N., Stedmon, C. A., Müller, R. A., Weyhenmeyer, G. A., Köhler, S. J., and Tranvik, L. J.: Controls of dissolved organic matter quality: evidence from a large-scale boreal lake survey, *Glob Chang Biol*, 20, 1101–1114, <https://doi.org/10.1111/gcb.12488>, 2014.
- Lapierre, J. F. and Del Giorgio, P. A.: Partial coupling and differential regulation of biologically and photochemically labile dissolved organic carbon across boreal aquatic networks, *Biogeosciences*, 11, 5969–5985, <https://doi.org/10.5194/bg-11-5969-2014>, 2014.
- Lei, J., Yang, L., and Zhu, Z.: Testing the effects of coastal culture on particulate organic matter using absorption and fluorescence spectroscopy, *J Clean Prod*, 325, 129203, <https://doi.org/10.1016/j.jclepro.2021.129203>, 2021.
- Pitta, E. and Zeri, C.: The impact of combining data sets of fluorescence excitation - emission matrices of dissolved organic matter from various aquatic sources on the information retrieved by PARAFAC modeling, *Spectrochim Acta A Mol Biomol Spectrosc*, 258, 119800, <https://doi.org/10.1016/j.saa.2021.119800>, 2021.

Retelletti Brogi, S., Cossarini, G., Bachi, G., Balestra, C., Camatti, E., Casotti, R., Checcucci, G., Colella, S., Evangelista, V., Falcini, F., Francocci, F., Giorgino, T., Margiotta, F., Ribera d'Alcalà, M., Sprovieri, M., Vestri, S., and Santinelli, C.: Evidence of Covid-19 lockdown effects on riverine dissolved organic matter dynamics provides a proof-of-concept for needed regulations of anthropogenic emissions, *Science of The Total Environment*, 812, 152412, <https://doi.org/10.1016/j.scitotenv.2021.152412>, 2022.

Shutova, Y., Baker, A., Bridgeman, J., and Henderson, R. K.: Spectroscopic characterisation of dissolved organic matter changes in drinking water treatment: From PARAFAC analysis to online monitoring wavelengths, *Water Res*, 54, 159–169, <https://doi.org/10.1016/j.watres.2014.01.053>, 2014.

Wauthy, M., Rautio, M., Christoffersen, K. S., Forsström, L., Laurion, I., Mariash, H. L., Peura, S., and Vincent, W. F.: Increasing dominance of terrigenous organic matter in circumpolar freshwaters due to permafrost thaw, *Limnol Oceanogr Lett*, 3, 186–198, <https://doi.org/10.1002/lol2.10063>, 2018.

Wünsch, U. J. and Murphy, K.: A simple method to isolate fluorescence spectra from small dissolved organic matter datasets, *Water Res*, 190, 116730, <https://doi.org/10.1016/j.watres.2020.116730>, 2021.

Wünsch, U. J., Murphy, K. R., and Stedmon, C. A.: Fluorescence Quantum Yields of Natural Organic Matter and Organic Compounds: Implications for the Fluorescence-based Interpretation of Organic Matter Composition, *Front Mar Sci*, 2, <https://doi.org/10.3389/fmars.2015.00098>, 2015.

Yamashita, Y., Kojima, D., Yoshida, N., and Shibata, H.: Relationships between dissolved black carbon and dissolved organic matter in streams, *Chemosphere*, 271, 129824, <https://doi.org/10.1016/j.chemosphere.2021.129824>, 2021.

Yu, H., Liang, H., Qu, F., Han, Z. S., Shao, S., Chang, H., and Li, G.: Impact of dataset diversity on accuracy and sensitivity of parallel factor analysis model of dissolved organic matter fluorescence excitation-emission matrix, *Sci Rep*, 5, 10207, <https://doi.org/10.1038/srep10207>, 2015.
